# Supplementary material for: Graphene Bridge for Photocatalytic Hydrogen Evolution with Gold Nanocluster Co-Catalysts
Source: MDPI journal article supplement (doi:10.3390/nano12203638), 2022-10-17
Supplement: s1 [file s1]

---

*Supplementary Materials*

# Graphene Bridge for Photocatalytic Hydrogen Evolution with Gold Nanocluster Co-Catalysts

Hanieh Mousavi <sup>1</sup>, Thomas D. Small <sup>1</sup>, Shailendra K. Sharma <sup>2</sup>, Vladimir B. Golovko <sup>2</sup>, Cameron J. Shearer <sup>1,\*</sup> and Gregory F. Metha <sup>1,\*</sup>

<sup>1</sup> Department of Chemistry, University of Adelaide, Adelaide SA 5005, Australia;

<sup>2</sup> The MacDiarmid Institute for Advanced Materials and Nanotechnology, School of Physical and Chemical Sciences, University of Canterbury, Christchurch 8140, New Zealand;

\* Correspondence: cameron.shearer@adelaide.edu.au (C.J.S.); greg.metha@adelaide.edu.au (G.F.M.)

---

## Contents

|              |                                                                                                                                                        |    |
|--------------|--------------------------------------------------------------------------------------------------------------------------------------------------------|----|
| <u>1.</u>    | <u>List of Figures</u> .....                                                                                                                           | 3  |
| <u>2.</u>    | <u>Supplementary experimental details</u> .....                                                                                                        | 4  |
| <u>2.1</u>   | <u>Methodology optimisation of photocatalysts preparation</u> .....                                                                                    | 4  |
| <u>2.2.1</u> | <u>The effect of Au mass loading on HER activity of Au<sub>101</sub>NC-AlSrTiO<sub>3</sub>:rGO</u> .....                                               | 4  |
| <u>2.2.2</u> | <u>The effect of heating in air and under vacuum on HER activity of Au<sub>101</sub>NC-AlSrTiO<sub>3</sub>:rGO</u> .....                               | 4  |
| <u>3.</u>    | <u>Supplementary experimental results and discussion</u> .....                                                                                         | 4  |
| <u>3.1</u>   | <u>Physical characterization</u> .....                                                                                                                 | 4  |
| <u>3.2</u>   | <u>Photocatalytic hydrogen evolution activity</u> .....                                                                                                | 7  |
| <u>3.2.1</u> | <u>The effect of Au mass loading on HER activity of Au<sub>101</sub>NC-AlSrTiO<sub>3</sub>:rGO</u> .....                                               | 7  |
| <u>3.2.2</u> | <u>The effect of heating in air and under vacuum on HER activity of Au<sub>101</sub>NC-AlSrTiO<sub>3</sub>:rGO</u> .....                               | 8  |
| <u>3.2.3</u> | <u>Appearance of Au<sub>101</sub>NC-AlSrTiO<sub>3</sub>:rGO and Au<sub>101</sub>NC-rGO:AlSrTiO<sub>3</sub> before and after photocatalytic HER</u> ... | 8  |
| <u>4.</u>    | <u>References</u> .....                                                                                                                                | 10 |

---

## 1. List of Figures and Tables

|                                                                                                                                                                                                                                                                                                                                                                                            |    |
|--------------------------------------------------------------------------------------------------------------------------------------------------------------------------------------------------------------------------------------------------------------------------------------------------------------------------------------------------------------------------------------------|----|
| <b>Figure S1.</b> The SEM image of AlSrTiO <sub>3</sub> . .....                                                                                                                                                                                                                                                                                                                            | 4  |
| <b>Figure S2.</b> (a-b) HAADF-STEM images and (c) size distribution histogram of unsupported Au <sub>101</sub> NC dropcast onto a TEM grid from methanol solution. ....                                                                                                                                                                                                                    | 5  |
| <b>Figure S3.</b> BF-STEM images of Au <sub>101</sub> NC-AlSrTiO <sub>3</sub> :rGO (a) before and (b) after HER and Au <sub>101</sub> NC-rGO:AlSrTiO <sub>3</sub> (c) before and (d) after HER. Au mass loading: 0.05 wt%. Annealing was performed at 210 °C in air for 15 min. ....                                                                                                       | 5  |
| <b>Figure S4.</b> EDX spectra of a chosen spot on (a) rGO in Au <sub>101</sub> NC-AlSrTiO <sub>3</sub> :rGO and (b) AlSrTiO <sub>3</sub> in Au <sub>101</sub> NC-rGO:AlSrTiO <sub>3</sub> . Annealing was performed at 210 °C in air for 15 min. The inserts are the HAADF-STEM images of the chosen area. ....                                                                            | 6  |
| <b>Figure S5.</b> EDX spectra of a chosen spot on rGO in (a) Au <sub>101</sub> NC-AlSrTiO <sub>3</sub> :rGO-HER and (b) Au <sub>101</sub> NC-rGO:AlSrTiO <sub>3</sub> -HER. Annealing was performed at 210 °C in air for 15 min. The inserts are the HAADF-STEM images of the chosen area. ....                                                                                            | 6  |
| <b>Figure S6.</b> UV Vis DRS of Au <sub>101</sub> NC-AlSrTiO <sub>3</sub> :rGO and Au <sub>101</sub> NC-rGO:AlSrTiO <sub>3</sub> compared to AlSrTiO <sub>3</sub> (a) before and (b) after HER. Annealing was performed in air at 210 °C for 15 min. ....                                                                                                                                  | 7  |
| <b>Figure S7.</b> Sacrificial liquid phase H <sub>2</sub> photocatalysis of Au <sub>101</sub> NC-AlSrTiO <sub>3</sub> :rGO (210 °C in air for 15 min) with Au mass loading of 0.05 and 1 wt%. (Conditions: 1:2 Methanol:Water, 365 nm at 83 mW/cm <sup>2</sup> , 2 h reaction time). ....                                                                                                  | 8  |
| <b>Figure S8.</b> Sacrificial liquid phase H <sub>2</sub> photocatalysis of unannealed, annealed (air), and annealed (vacuum) Au <sub>101</sub> NC-AlSrTiO <sub>3</sub> :rGO. Au mass loading 1 wt%, 1:2 Methanol:Water, LED 365 nm at 83 mW/cm <sup>2</sup> for 2 h. Annealing was performed at 210 °C for 15 min. ....                                                                   | 8  |
| <b>Figure S9.</b> Photographs showing sample dispersions of (a) Au <sub>101</sub> NC-AlSrTiO <sub>3</sub> :rGO and (b) Au <sub>101</sub> NC-rGO:AlSrTiO <sub>3</sub> before (left images) and after (right images) photocatalytic HER. Au mass loading 0.05 wt%, 1:2 Methanol:Water, LED 365 nm at 83 mW/cm <sup>2</sup> for 2h. Annealing was performed at 210 °C in air for 15 min. .... | 9  |
| <b>Figure S10.</b> Photographs showing dispersions of Au <sub>101</sub> NCs (1 mg mL <sup>-1</sup> ) in (a) 1:2 Methanol:Water and (b) Methanol. ....                                                                                                                                                                                                                                      | 10 |
| <b>Table S1.</b> Average external quantum efficiencies (EQE)% for synthesized photocatalysts, assuming 2 electrons per H <sub>2</sub> molecule produced.                                                                                                                                                                                                                                   |    |

## 2. Supplementary experimental details

### 2.1 Methodology optimisation of photocatalysts preparation

#### 2.2.1 The effect of Au mass loading on HER activity of Au<sub>101</sub>NC-AlSrTiO<sub>3</sub>:rGO

To make 10 mg Au<sub>101</sub>NC-AlSrTiO<sub>3</sub>:rGO with 0.05 and 1 wt% Au, 6.4  $\mu$ L and 128  $\mu$ L of an Au<sub>101</sub>NC dispersion (1 mg mL<sup>-1</sup> ligated Au mass) were added dropwise to 10 mg of AlSrTiO<sub>3</sub> dispersed in 2 mL methanol in a porcelain evaporating dish and homogenised using bath sonication at RT until the solvent completely evaporated. The as-obtained Au<sub>101</sub>NC-AlSrTiO<sub>3</sub> samples were dispersed and homogenised in 2 mL methanol via bath sonication (2 min). Then 16.6  $\mu$ L of the as-synthesized rGO dispersion was added dropwise to each dispersion with bath sonication at RT until the solvent completely evaporated. The as-obtained Au<sub>101</sub>NC-AlSrTiO<sub>3</sub>:rGO samples were annealed in a muffle furnace at 210 °C in air for 15 min.

#### 2.2.2 The effect of heating in air and under vacuum on HER activity of Au<sub>101</sub>NC-AlSrTiO<sub>3</sub>:rGO

The as-obtained Au<sub>101</sub>NC-AlSrTiO<sub>3</sub>:rGO with 1 wt% of Au was placed in a porcelain evaporating dish was annealed in air in a muffle furnace and vacuum (< 0.01 bar) in a tube furnace (Across International, STF1200, quartz tube) at 210 °C for 15 min. This sample was compared with unannealed Au<sub>101</sub>NC-AlSrTiO<sub>3</sub>:rGO using photocatalysis.

## 3. Supplementary experimental results and discussion

### 3.1 Physical characterization

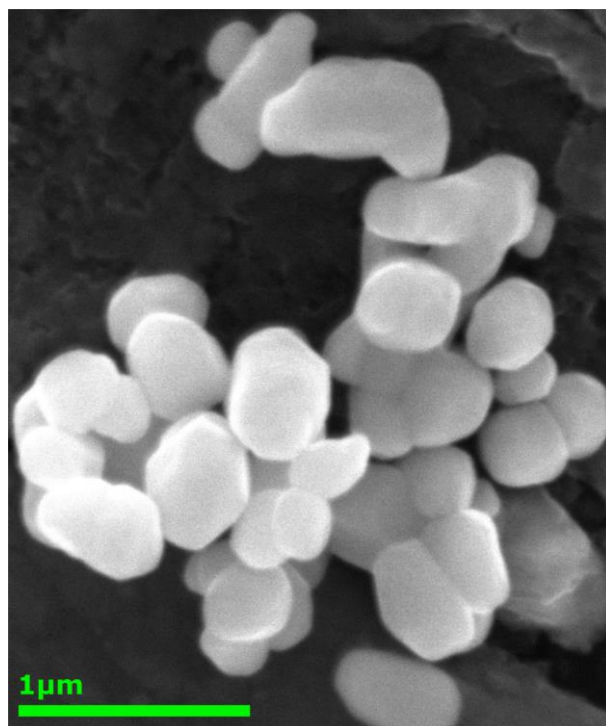

**Figure S1.** SEM image of AlSrTiO<sub>3</sub>.

In order to determine if the size of the AuNCs changes during the formation of the photocatalyst, it is first required to benchmark the size of the as-prepared AuNCs. Figure S2(a-c) presents the high-resolution HAADF-STEM images and the measured cluster size histogram fitted to a log-normal distribution. The Au<sub>101</sub>NCs have a mean diameter of  $1.74 \pm 0.29$  nm and a mode of 1.52 nm. 3.9% of the clusters have diameters smaller than 1 nm and 25.6 % larger than 2 nm. In our previous publication which used a different batch of Au<sub>101</sub>NC, we measured an average diameter of  $1.3 \pm 0.4$  nm with 26.4% of particles less than 1 nm and 3.4 % greater than 2 nm [1].

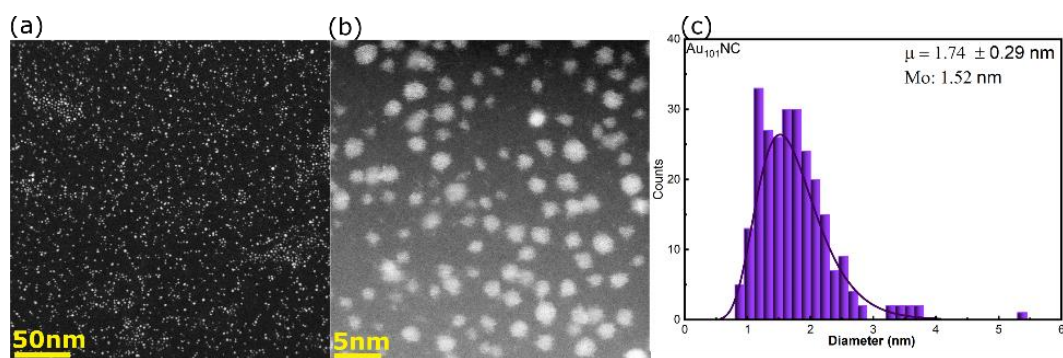

**Figure S2.** (a-b) HAADF-STEM images and (c) size distribution histogram of unsupported Au<sub>101</sub>NC dropcast onto a TEM grid from methanol solution.

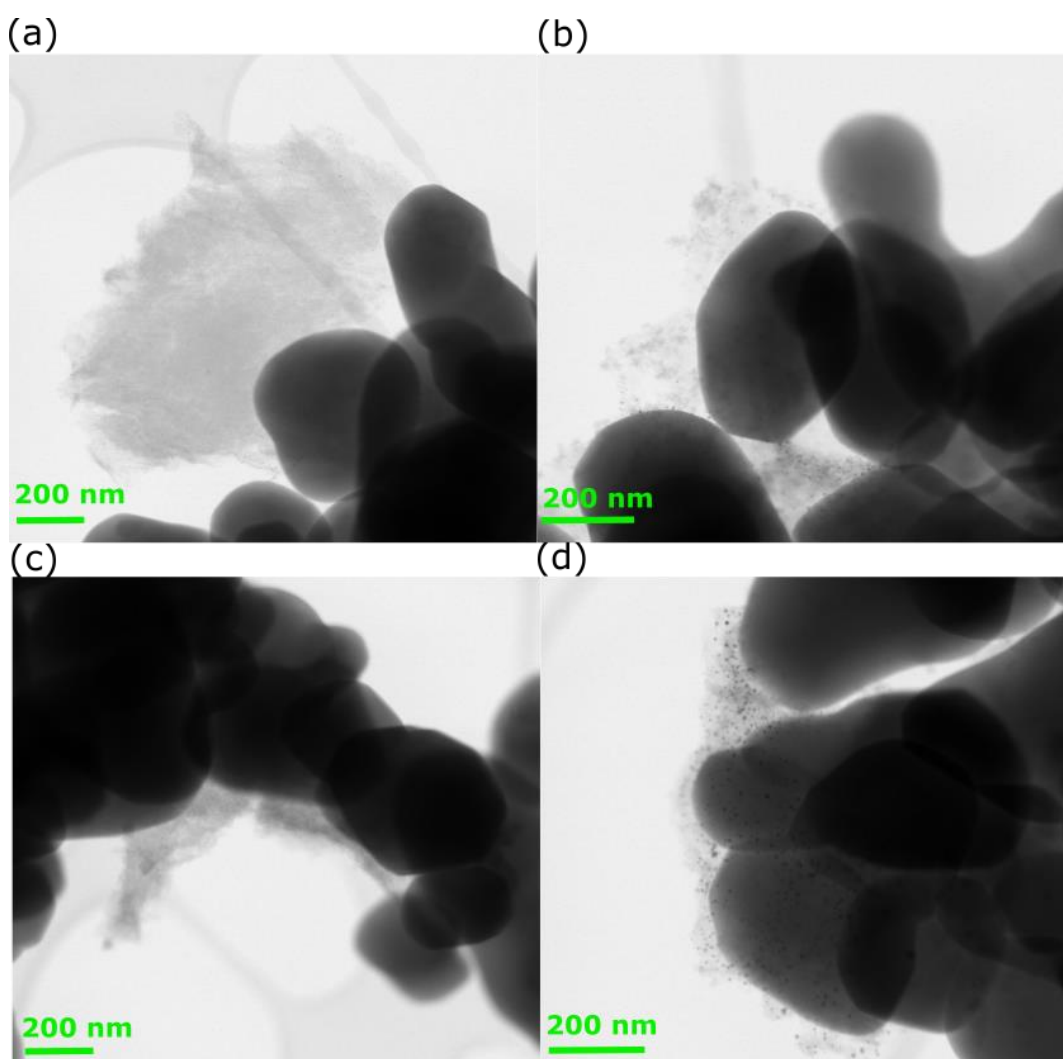

**Figure S3.** BF-STEM images of Au<sub>101</sub>NC-AlSrTiO<sub>3</sub>:rGO (a) before and (b) after HER and Au<sub>101</sub>NC-rGO:AlSrTiO<sub>3</sub> (c) before and (d) after HER. Au mass loading: 0.05 wt%. Annealing was performed at 210 °C in air for 15 min.

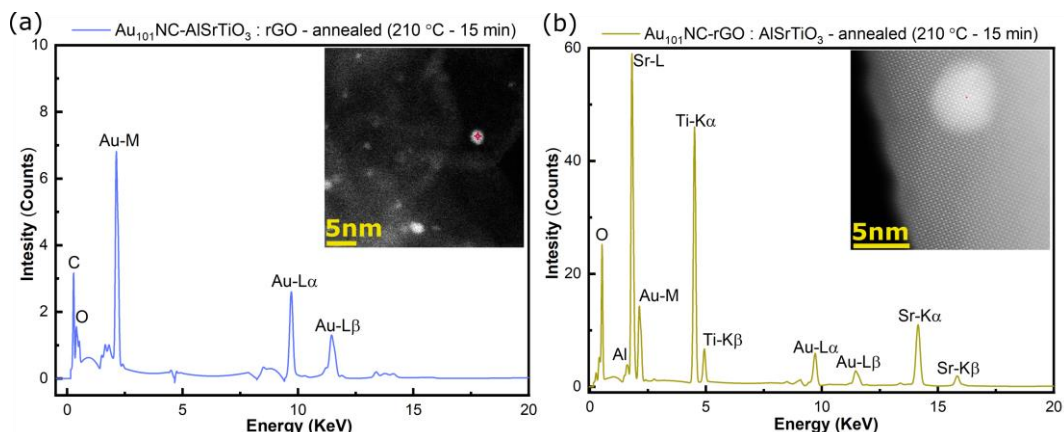

**Figure S4.** EDX spectra of the selected spot on (a) rGO in  $\text{Au}_{101}\text{NC-AlSrTiO}_3:\text{rGO}$  and (b)  $\text{AlSrTiO}_3$  in  $\text{Au}_{101}\text{NC-rGO}:\text{AlSrTiO}_3$ . Annealing was performed at  $210^\circ\text{C}$  in air for 15 min. The inserts are the HAADF-STEM images of the chosen area.

EDX spectra from a selected area of rGO from  $\text{Au}_{101}\text{NC-AlSrTiO}_3:\text{rGO-HER}$  and  $\text{Au}_{101}\text{NC-rGO}:\text{AlSrTiO}_3\text{-HER}$  samples is shown in Figure S5(a-b). Interestingly, in both samples, signal from  $\text{SrTiO}_3$  is seen on rGO after, but not before, HER. Future work is required to find out how this occurs and its possible effect on photocatalytic activity.

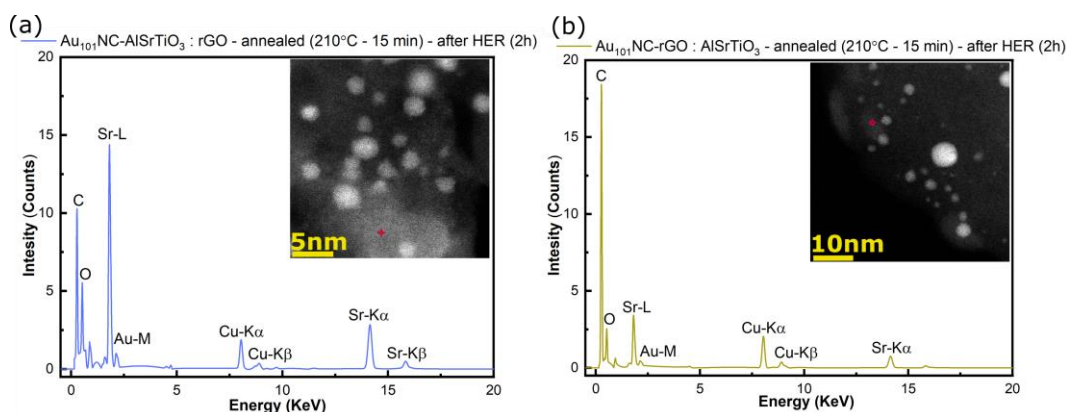

**Figure S5.** EDX spectra of a selected spot on rGO in (a)  $\text{Au}_{101}\text{NC-AlSrTiO}_3:\text{rGO-HER}$  and (b)  $\text{Au}_{101}\text{NC-rGO}:\text{AlSrTiO}_3\text{-HER}$ . Annealing was performed at  $210^\circ\text{C}$  in air for 15 min. The inserts are the HAADF-STEM images of the chosen area.

UV-Vis DRS was used to measure the optical properties and agglomeration state of  $\text{Au}_{101}\text{NC}$  for the as-prepared  $\text{Au}_{101}\text{NC-AlSrTiO}_3:\text{rGO}$  and  $\text{Au}_{101}\text{NC-rGO}:\text{AlSrTiO}_3$  before and after photocatalysis and compared to  $\text{AlSrTiO}_3$  (Figure S6(a-b)). In Figure S6(a),  $\text{AlSrTiO}_3$  exhibits a typical absorption edge at 387 nm indicating a band gap of 3.2 eV. The bandgap of  $\text{AlSrTiO}_3$  and the UV light absorption intensity are effectively identical upon addition of both rGO and  $\text{Au}_{101}\text{NC}$  onto  $\text{AlSrTiO}_3$ , indicating that the electronic structure and optical properties of the  $\text{AlSrTiO}_3$  are not altered. The slight absorption from 385 – 800 nm is due to the visible light absorbance of rGO [2]. The photocatalysis was performed at 365 nm (3.4 eV), where  $\text{AlSrTiO}_3$  has strong absorbance and  $\text{Au}_{101}\text{NC}$  and rGO has negligible UV light absorbance. Additionally, no peak at ca. 520 nm due to Au surface plasmon resonance was observed, indicating that there is no agglomeration of  $\text{Au}_{101}\text{NC}$  deposited onto either rGO or  $\text{AlSrTiO}_3$ . Likewise, evolving hydrogen under illumination did not cause agglomeration of the  $\text{Au}_{101}\text{NC}$ , as no peak at 520 nm was observed for samples that were measured after performing HER for two hours.

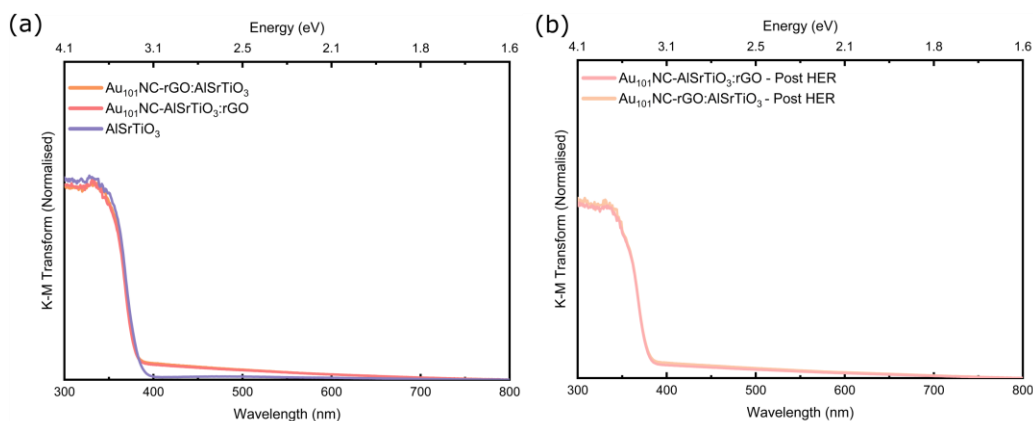

**Figure S6.** UV-Vis DRS of  $\text{Au}_{101}\text{NC-AlSrTiO}_3\text{:rGO}$  and  $\text{Au}_{101}\text{NC-rGO:AlSrTiO}_3$  compared to  $\text{AlSrTiO}_3$  (a) before and (b) after HER. Annealing was performed in air at 210 °C for 15 min.

### 3.2 Photocatalytic hydrogen evolution activity

**Table S1.** Average external quantum efficiencies (EQE)% for synthesized photocatalysts, assuming 2 electrons per  $\text{H}_2$  molecule produced.

| Photocatalyst                                   | Average $\text{H}_2$ EQE%<br>(at 2 hours) |
|-------------------------------------------------|-------------------------------------------|
| rGO                                             | 0.00046                                   |
| $\text{AlSrTiO}_3$                              | 0.00079                                   |
| $\text{Au}_{101}\text{NC-rGO}$                  | 0.00035                                   |
| $\text{Au}_{101}\text{NC-rGO:AlSrTiO}_3$        | 0.04304                                   |
| $\text{Au}_{101}\text{NC-AlSrTiO}_3$            | 0.00513                                   |
| $\text{Au}_{101}\text{NC-AlSrTiO}_3\text{:rGO}$ | 0.04964                                   |
| $\text{rGO-AlSrTiO}_3$                          | 0.00507                                   |

#### 3.2.1 The effect of Au mass loading on HER activity of $\text{Au}_{101}\text{NC-AlSrTiO}_3\text{:rGO}$

Figure S7 presents the effect of Au mass loading (0.05% and 1 wt%) on the photocatalytic HER activity in the  $\text{Au}_{101}\text{NC-AlSrTiO}_3\text{:rGO}$  nanocomposite. Increasing the Au mass loading by 20 times results in a  $\times 1.6$  increase in photocatalytic activity with the average  $\text{H}_2$  production rate changing from  $334 \pm 24$  to  $539 \pm 14 \text{ nmol h}^{-1}$ .

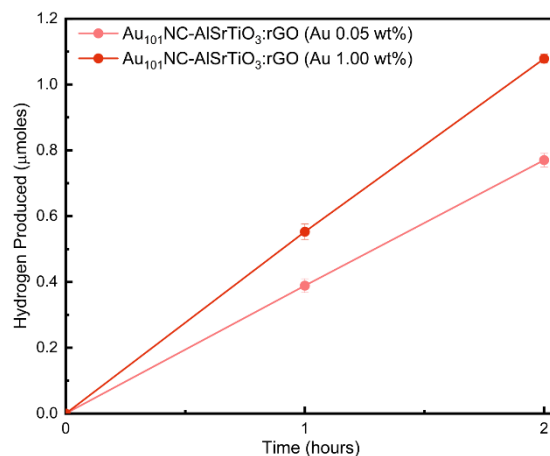

**Figure S7.** Sacrificial liquid phase H<sub>2</sub> photocatalysis of Au<sub>101</sub>NC-AlSrTiO<sub>3</sub>:rGO (210 °C in air for 15 min) with Au mass loading of 0.05 and 1 wt%. (Conditions: 1:2 Methanol:Water, 365 nm at 83 mW/cm<sup>2</sup>, 2 h reaction time).

### 3.2.2 The effect of heating in air and under vacuum on HER activity of Au<sub>101</sub>NC-AlSrTiO<sub>3</sub>:rGO

To optimize the synthesis of photocatalysts, different annealing methods (air and vacuum) were applied. Figure S8 presents the effect of heating in air and under vacuum at 210 °C for 15 min on the photocatalytic HER activity of Au<sub>101</sub>NC-AlSrTiO<sub>3</sub>:rGO with 1% Au mass loading compared with unannealed samples. The photocatalytic activity was found to increase in the order; air annealing > vacuum annealing > not annealed, with average H<sub>2</sub> production rates of 1110, 510, and 320 nmol after 2h, respectively. Future work is required to find out the reasons for high HER activity of photocatalysts in air than vacuum.

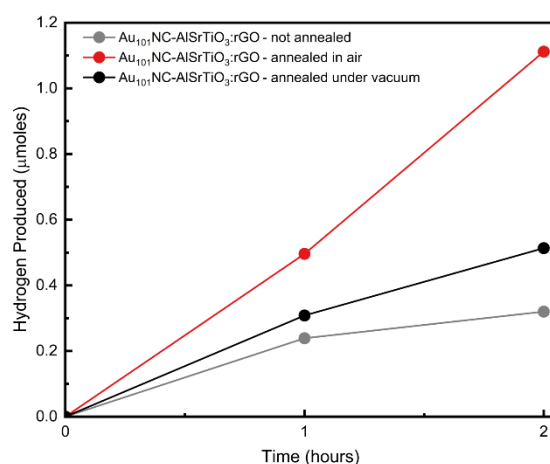

**Figure S8.** Sacrificial liquid phase H<sub>2</sub> photocatalysis of unannealed, annealed (air), and annealed (vacuum) Au<sub>101</sub>NC-AlSrTiO<sub>3</sub>:rGO. Au mass loading 1 wt%, 1:2 Methanol:Water, LED 365 nm at 83 mW/cm<sup>2</sup> for 2 h. Annealing was performed at 210 °C for 15 min.

### 3.2.3 Appearance of Au<sub>101</sub>NC-AlSrTiO<sub>3</sub>:rGO and Au<sub>101</sub>NC-rGO:AlSrTiO<sub>3</sub> before and after photocatalytic HER

Figure S9(a-b) shows photographs of the AlSrTiO<sub>3</sub>:rGO and Au<sub>101</sub>NC-rGO:AlSrTiO<sub>3</sub> dispersion solutions used for photocatalytic HER. There is no observable change in the solution colour indicating the resistance of the as-prepared nanocomposites toward agglomeration (i.e. no presence of Au surface plasmon resonance), consistent with the DRS.



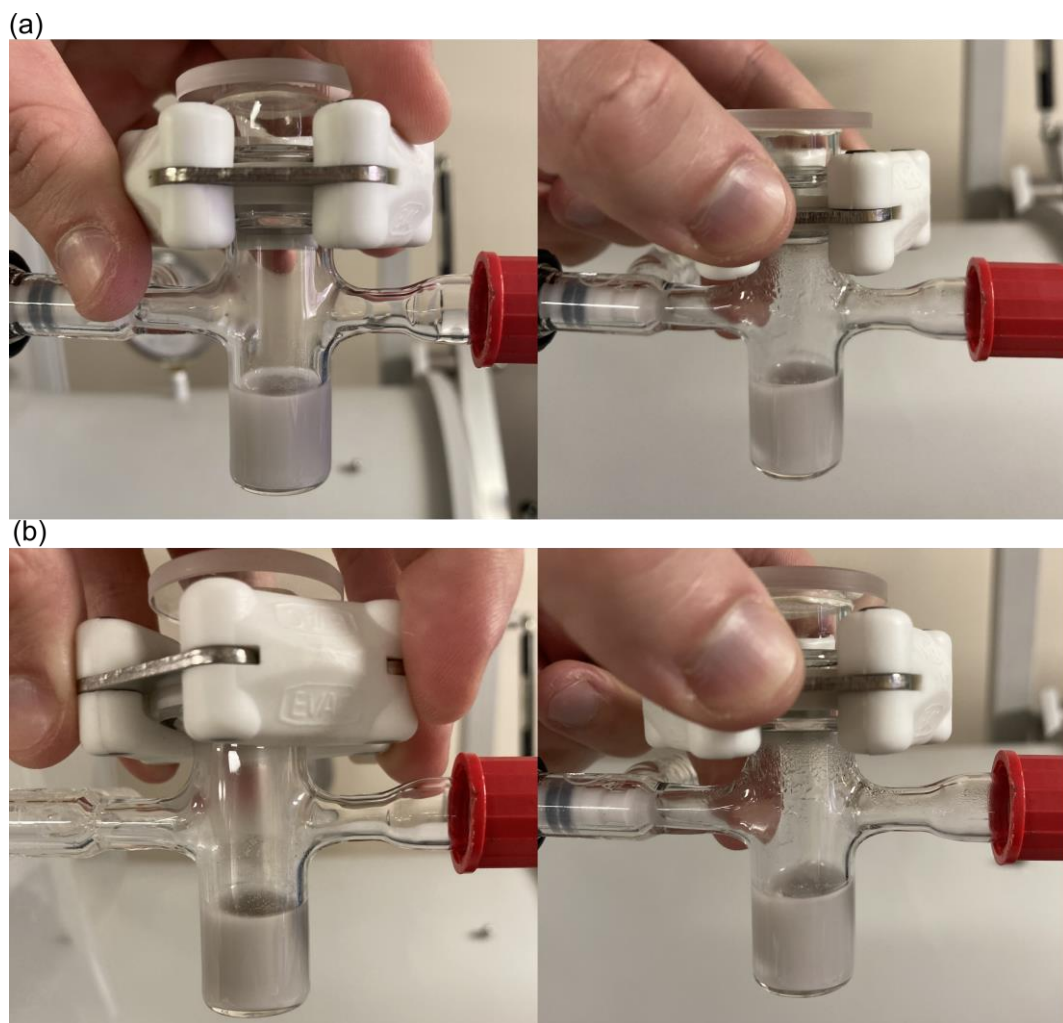

**Figure S9.** Photographs showing sample dispersions of the (a)  $\text{Au}_{101}\text{NC-AlSrTiO}_3\text{:rGO}$  and (b)  $\text{Au}_{101}\text{NC-rGO:AlSrTiO}_3$  samples before (left images) and after (right images) photocatalytic HER. Au mass loading 0.05 wt%, 1:2 Methanol:Water, LED 365 nm at 83 mW/cm<sup>2</sup> for 2h. Annealing was performed at 210 °C in air for 15 min.

Figure S10(a-b) shows the solubility of  $\text{Au}_{101}\text{NC}$  (1 mg mL<sup>-1</sup>) in (a) 1:2 Methanol:Water and (b) Methanol.  $\text{Au}_{101}\text{NC}$  is highly soluble in methanol while it has very limited solubility in 1:2 Methanol:Water, indicating the adsorbed  $\text{Au}_{101}\text{NC}$  is unlikely to desorb from the surface of  $\text{AlSrTiO}_3\text{/rGO}$  in 1:2 Methanol:Water during photocatalysis.

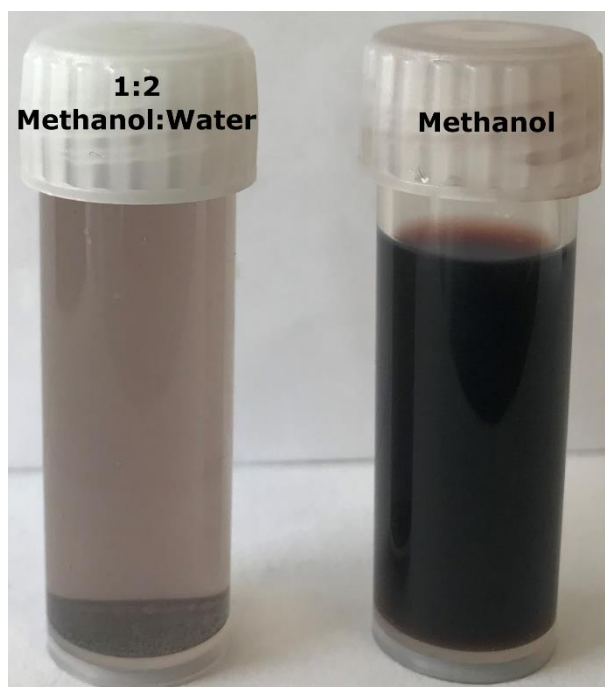

**Figure S10.** Photographs showing dispersions of Au<sub>101</sub>NC (1 mg mL<sup>-1</sup>) in (a) 1:2 Methanol:Water and (b) Methanol.

#### 4. References

1. Mousavi, H.; Yin, Y.; Howard-Fabretto, L.; Sharma, S.K.; Golovko, V.; Andersson, G.G.; Shearer, C.J.; Metha, G.F. Au<sub>101</sub>-rGO nanocomposite: Immobilization of phosphine-protected gold nanoclusters on reduced graphene oxide without aggregation. *Nanoscale Adv* **2021**, *3*, 1422-1430.
2. Albero, J.; Mateo, D.; García, H.J.M. Graphene-based materials as efficient photocatalysts for water splitting. *Molecules* **2019**, *24*, 906.
